# Supplementary material
Source: publisher figshare collection journal article supplement (https://acs.figshare.com/ndownloader/files/4144945)
Supplement: Supplementary file 5 [file 4144945]

# **Supporting information for:**

## **Organic Nanostructures on Hydrogen-Terminated Silicon Report on Electric Field Modulation of Dangling Bond Charge State**

Peter M. Ryan,<sup>†,‡</sup> Lucian Livadaru,<sup>†,‡</sup> Gino A. DiLabio,<sup>\*,†,‡</sup> and Robert A.  
Wolkow<sup>\*,†,‡</sup>

*Department of Physics, University of Alberta, Edmonton, Canada, and National Institute for  
Nanotechnology, 11421 Saskatchewan Drive, Edmonton, Alberta, Canada. T6G 2M9*

E-mail: Gino.DiLabio@nrc.ca; rwalkow@ualberta.ca

## **1 Supporting Information**

### **1.1 Self-consistent solution for band bending at the silicon surface in the presence of a biased STM tip, DBs, and adsorbed molecules**

We assume an areal density of DBs on the surface is  $N_{DB}$ , and the energy of the  $DB^-$  and  $DB^+$  states with respect to the VBM are denoted by  $E_{DB^-}$  and  $E_{DB^+}$ . A CBMK intermediate has an energy level,  $E_{C^*}$ , corresponding to the  $C^*$  radical situated in the band gap of silicon. The presence of a lone electron in the  $C^*$  level, in the immediate vicinity of the surface, implies the

---

\*To whom correspondence should be addressed

<sup>†</sup>Department of Physics, University of Alberta, Edmonton, Canada

<sup>‡</sup>National Institute for Nanotechnology, 11421 Saskatchewan Drive, Edmonton, Alberta, Canada. T6G 2M9

possibility of its escape via elastic tunneling to the bulk or via recombination with an itinerant hole from silicon. The latter is an inelastic capture event, characterized by an capture cross section  $\sigma_p^*$ . The rate of recombination, denoted by  $R_{\text{rec}}$ , depends on the concentration of holes in the subsurface region

$$R_{\text{rec}} = \sigma_p^* p v_p, \quad (1)$$

where  $p$  is the free electron concentration at the surface and  $v_p$  is their thermal velocity. In turn,  $p$  depends (self-consistently) on the total amount of band bending at the surface due to the biased STM probe and the charging of the surface states.

We formulated and solved a self-consistent boundary-value problem (BVP-1) for the electric potential  $U$  in the presence of the STM tip and surface states, consisting of the Poisson and Schroedinger equations written respectively as

$$\nabla^2 U(r) = -\frac{e}{\epsilon_{Si}} [N_D^+ + p(r) - N_A^- - n(r) + \rho_0(r)] \quad (2)$$

and

$$-\frac{\hbar^2}{2m} \nabla^2 \psi(r) + U(r) \psi(r) = E \psi(r), \quad (3)$$

which can be compactly combined as

$$\nabla^2 U(r) = -\frac{e}{\epsilon_{Si}} \rho_{\text{total}}\{U(r)\} \quad (4)$$

where  $\{ \}$  denotes functional dependence. In the above,  $N_D^+$  and  $N_A^-$  are the concentrations of ionized donors and acceptors,  $\epsilon_{Si}$  is the electric permittivity of silicon;  $\rho_0$  is the charge on all surface states, while  $n$  and  $p$  are the concentrations of itinerant electron and holes in the crystal. Employing the semiclassical approximation, the latter quantities can be calculated with the help of the 1/2 Fermi-Dirac integral,  $F_{1/2}$

$$n(r) = N_c F_{1/2} \{ [E_F - E_{CBM}^{\text{bulk}} + eU(r)] / k_B T \} \quad (5)$$

$$p(r) = N_v F_{1/2} \{ [E_{VBM}^{bulk} - eU(r) - E_F] / k_B T \} \quad (6)$$

where  $N_c$  and  $N_v$  are the effective density of states at the edges of the conduction ( $E_{CBM}$ ) and valence ( $E_{VBM}$ ) bands, respectively,  $E_F$  is the Fermi level and  $k_B T$  is the temperature in energy units. The negative charge accumulated on the DBs is

$$\rho_0^- = N_{DB} f_{FD}(E_{DB}, E_F). \quad (7)$$

with a similar expression for the positive DB charge. We also include the possibility of charge on any molecular ad layer on silicon. Thus the net charge on the surface will be

$$\rho_0 = \rho_0^+ - \rho_0^-, \quad (8)$$

which is compensated by a subsurface space-charge layer in the bulk silicon. The BVP-1 also includes the appropriate set of boundary conditions (BC) denoted by BC-1, described below.

We solved the above BVP-1 by the finite element method (FEM). Even in the absence of an STM tip, surface states alone can accumulate charge and induce the crystal bands to bend at the surface. In the presence of the STM tip, the effects of tip-induced and surface state-induced band bending coexist and have to be solved self-consistently. However, we note that the tip-induced band bending has a finite spatial extent due to screening, while the surface state-induced band bending is more or less uniform along the surface (laterally). This means that far away from the tip, along the surface, the total band bending will be identical with that in the absence of the tip. Therefore, this lateral condition forms part of the set BC-1 for our BVP-1 problem. The other BCs in this set are the Dirichlet condition  $U = U_{bias} + U_{cont}$  at the surface of the tip, and  $U=0$  far inside the bulk of the crystal, where  $U_{bias}$  and  $U_{cont}$  are the values of the bias and the contact potential between tip and sample.

While the two latter BCs are easily imposed in an FEM calculation, the lateral BC presents

some technical difficulties. A straightforward but naive way to implement it would be to solve for  $U_0(\mathbf{r})$  in the absence of the STM tip on a laterally large FEM domain and then impose a Dirichlet BC with the values of  $U_0$  at the edges of the domain to solve BVP-1. However, when doing so, the results show unphysical behavior in the form of non-monotonic surface-parallel variations of  $U$  as a function of the lateral distance from the tip apex, which furthermore strongly depends on how fine the FEM mesh is at the lateral extremities of the domain. This approach is therefore deemed unreliable.

Another approach is therefore needed in order to impose the correct lateral BC on BVP-1. First we note that for the system in the presence of surface states only, the appropriate BVP-0 can be written as

$$\nabla^2 U_0(r) = -\frac{e}{\epsilon_{Si}} \rho_{total}^0\{U_0(r)\}, \quad (9)$$

with the boundary condition set BC-0:

$$\nabla U_0(r) = 0, \text{ for } z > 0, \quad (10)$$

$$U_0(r) = 0, \text{ for } z < 0, |z| \rightarrow \infty. \quad (11)$$

Subtracting eq (9) from eq (4) we obtain a new differential equation

$$\nabla^2 U'(r) = -\frac{e}{\epsilon_{Si}} [\rho_{total}\{(U' + U_0)(r)\} - \rho_{total}^0\{U_0(r)\}], \quad (12)$$

where  $U'(r) \equiv U(r) - U_0(r)$  is the unknown function of a new BVP-2 to be solved (note that  $U_0$  is previously and separately solved for). The advantage of this new BVP is that the lateral boundary condition simplifies to  $U'(r) \rightarrow 0$  as  $|r_{xy}| \rightarrow \infty$ , due to the fact that  $U$  and  $U_0$  have the same values asymptotically. To complete the set BC-2 for BVP-2, we must add the Dirichlet condition  $U' = U_{bias} + U_{cont}$  at the surface of the tip, and  $U' = 0$  far inside the bulk of the crystal. This BVP-2 is actually the second problem (after BVP-0) that we solve by employing FEM, as it is easily amenable and well behaved on a finite element domain. Also, we further simplify the problem

by assuming both the tip and the whole domain to have axial symmetry. The above BVPs are self-consistently solved by iterations each consisting of an FEM calculation. Once  $U_0$  and  $U'$  are computed,  $U$  is simply found by adding the two functions. Further details are given in an upcoming paper.

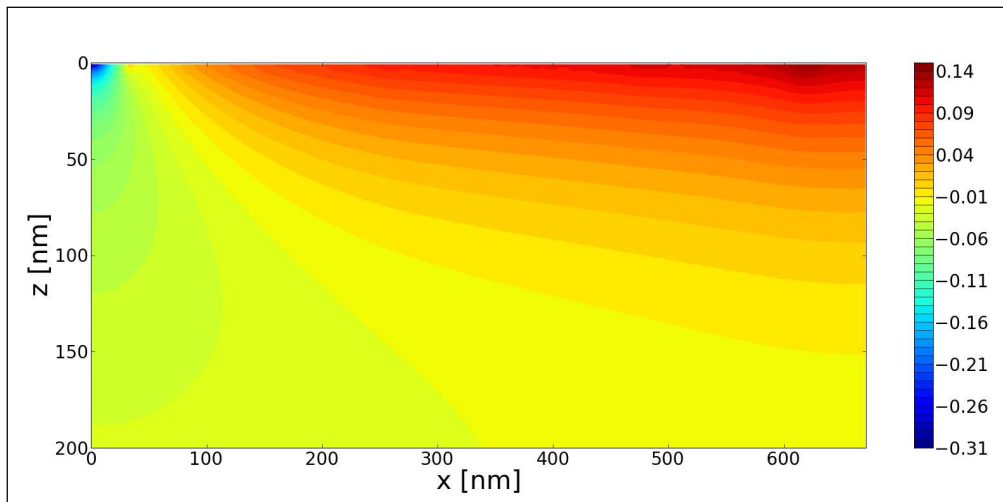

Figure S1: Images of a representative large cluster used for the *stage 1* (see manuscript) calculations. Shown are the transition state structure from H-abstraction by the CBMK addition intermediate. Views: a) end-on, b) top-down, c) side-on.

## 1.2 DFT models associated with the calculations described in the text

DFT calculations were performed with the Gaussian 03 package.<sup>S1</sup>

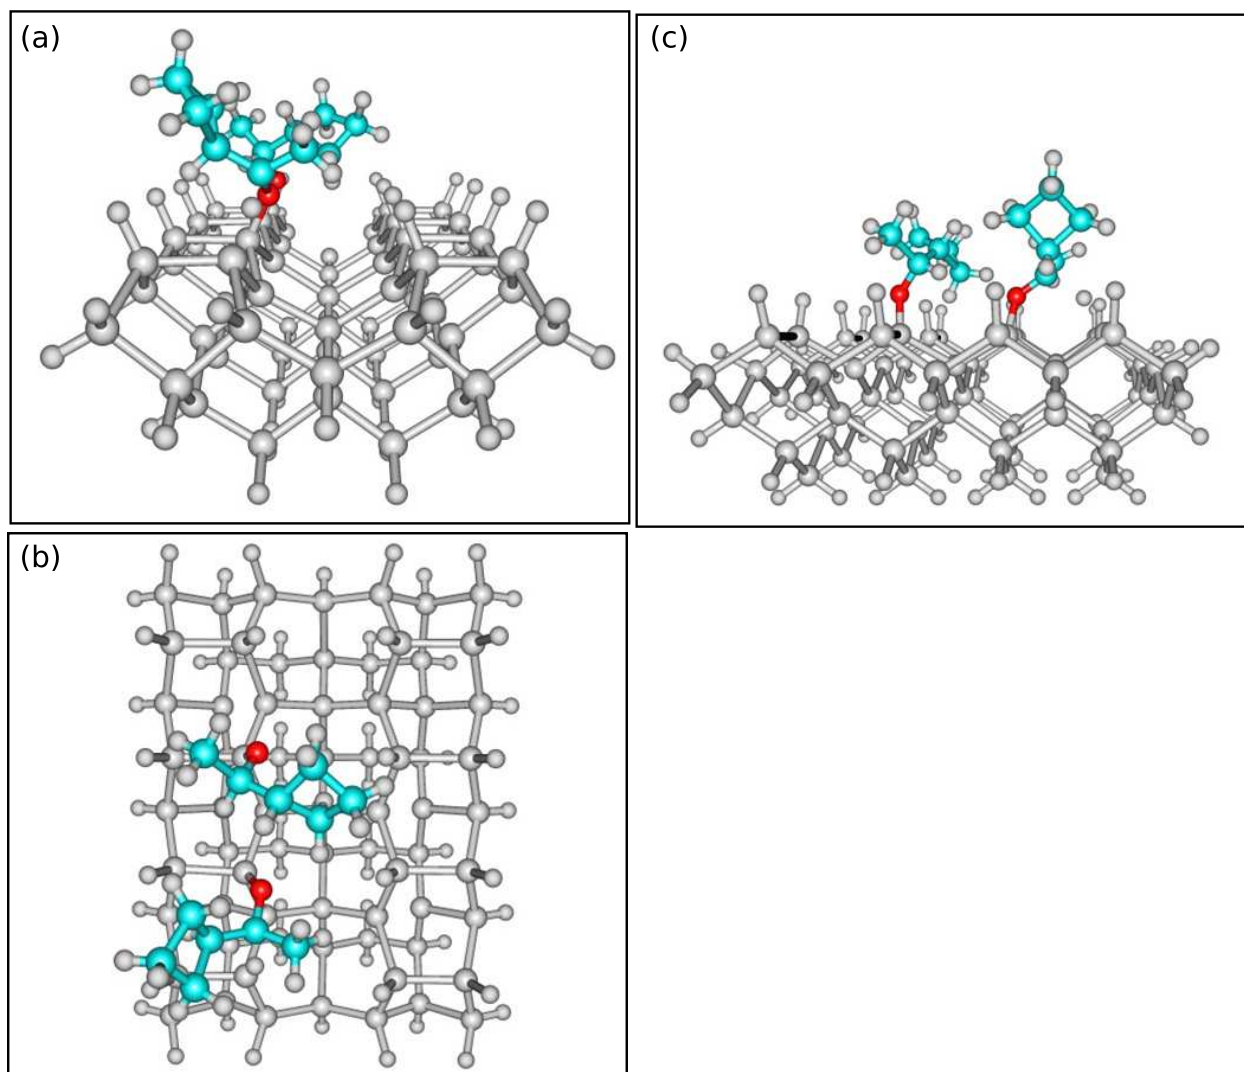

Figure S2: Images of a representative large cluster used for the *stage 1* (see manuscript) calculations. Shown are the transition state structure from H-abstraction by the CBMK addition intermediate. Views: a) end-on, b) top-down, c) side-on.

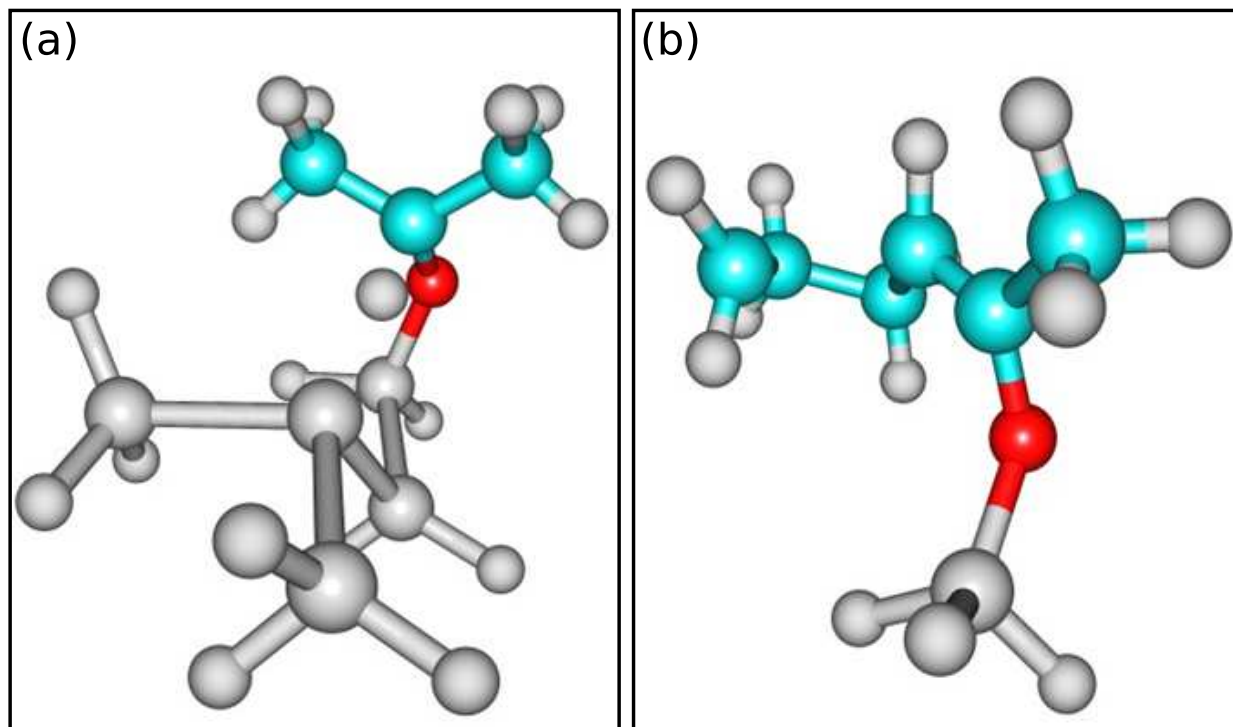

Figure S3: Images of representative small clusters used for the *stage 2* (see manuscript) calculations. Shown are the transition state structures for (a) H-abstraction and (b) ring opening.

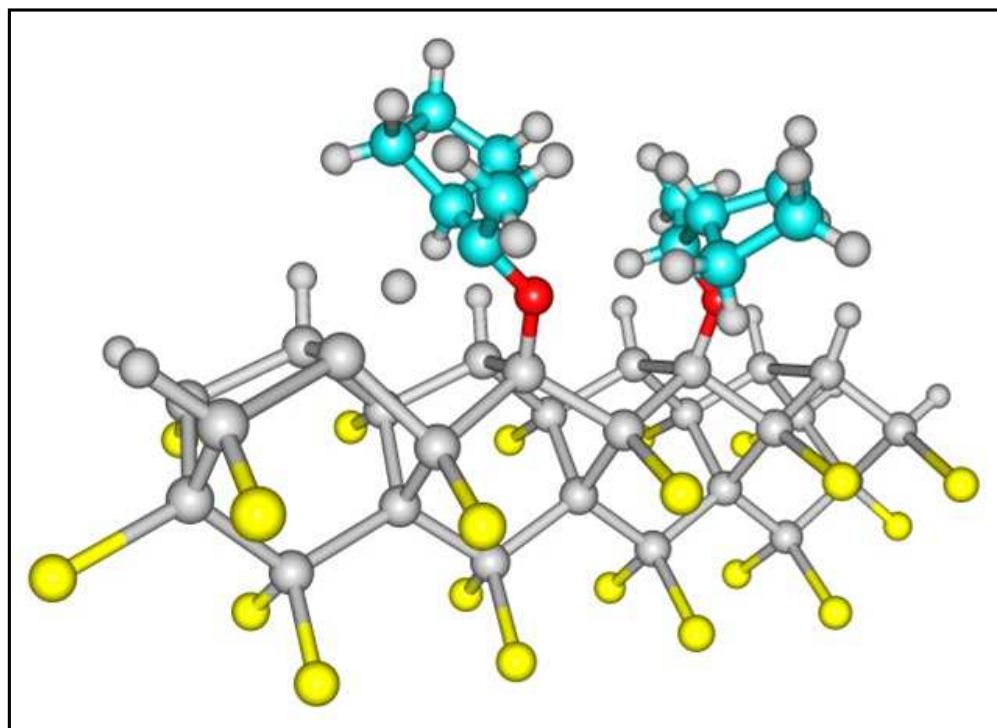

Figure S4: Image representative of a cluster used for the *stage 3* (see manuscript) calculations. Shown is the optimized structure for the transition state for H-abstraction.

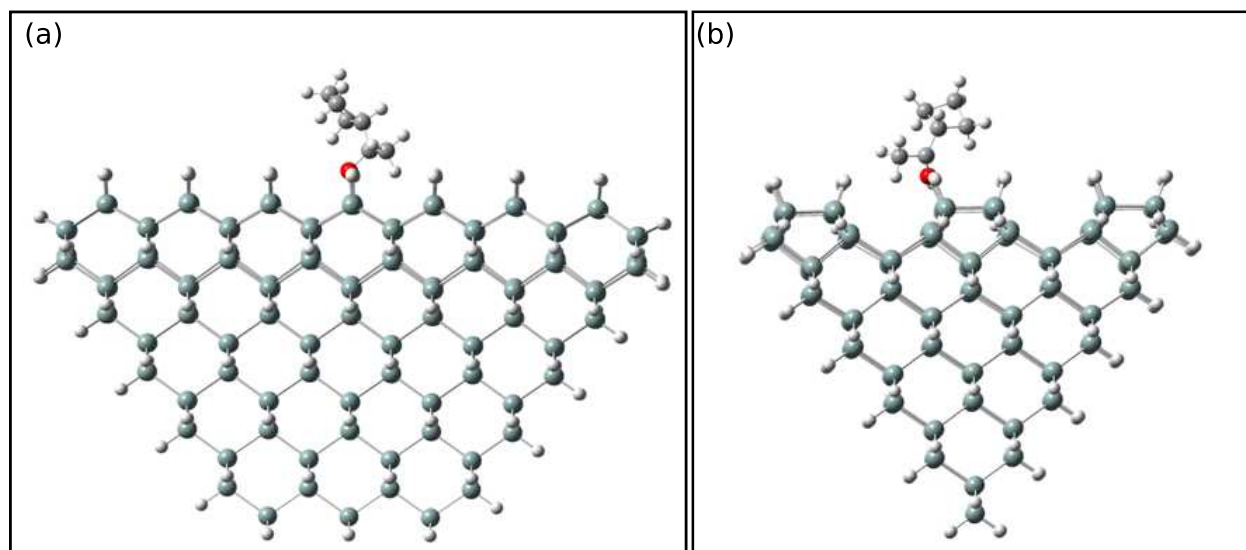

Figure S5: Side (a) and end view (b) of the cluster used to estimate the energy level of the SOMO of CBMK bound to a neutral DB on H-Si(100)-2x1. Key: Silicon - steel grey, carbon - grey, oxygen - red, hydrogen - white.

**Table S1.** Absolute B971-DCP electronic energies (Hartree) of systems related to the reaction of second CBMK on a cluster representing hydrogen-terminated silicon. See text for details of the calculation methods. Calculations utilized 6-31+G(d,p) basis sets for C, H, and O and 6-31G(d) basis sets for Si.

| Number | Molecule/cluster system                                                                          | Eel           |
|--------|--------------------------------------------------------------------------------------------------|---------------|
| 1      | CBMK                                                                                             | -309.655164   |
| 2      | Passivated CBMK on H-Si with radical site                                                        | -20898.438157 |
| 3      | Addition product of the reaction of 1 + 2                                                        | -21208.122311 |
| 4      | Transition state structure associated with H abstraction from the next dimer in the row (from 3) | -21208.102693 |
| 5      | Transition state structure associated with CBMK ring opening (from 3)                            | -21208.099687 |



**Table S2.** Absolute CBS-QB3 and B971-DCP electronic energies (Hartree) of systems related to the reaction of second CBMK on a cluster representing hydrogen-terminated silicon. See text for details of the calculation methods. Representative structures are shown in Figure S3. Structures were frozen in the geometries optimized from the large cluster optimizations.

| Number | Molecule/cluster system                                  | Eel (CBS)    | Eel (B971)   |
|--------|----------------------------------------------------------|--------------|--------------|
| 1      | Reduced model of addition species for ring opening       | -600.861986  | -600.853660  |
| 2      | Reduced model of ring opening transition state (from 1)  | -600.83 044  | -600.830294  |
| 3      | Reduced model of addition species for H-abstraction      | -1646.421136 | -1646.757590 |
| 4      | Reduced model of H-abstraction transition state (from 3) | -1646.398331 | -1646.736776 |

**Table S3.** Data used to compute the rate constants (at 300 K) for the ring-opening and H-abstraction reactions associated with CBMK on H-Si.

| Quantity                            | Ring-opening | H-abstraction |
|-------------------------------------|--------------|---------------|
| ZPE (a.u.)                          | 0.456437     | 0.45779       |
| $E_{therm}$ (a.u.)                  | 0.555689     | 0.556033      |
| Q                                   | 2.04E+72     | 1.4E+71       |
| Eel (a.u.)                          | -21208.09969 | -21208.1      |
| RT (kcal/mol)                       | 0.596        | 0.596         |
| $kT/h$ (s <sup>-1</sup> )           | 6.25093E+12  | 6.25E+12      |
| $E_0$ (kcal/mol)                    | 14.08        | 12.56         |
| A (s <sup>-1</sup> )                | 1.98E+12     | 1.36E+11      |
| $E_a$ (kcal/mol)                    | 13.35        | 12.45         |
| k (s <sup>-1</sup> )                | 2.20E+02     | 96.79         |
| k (s <sup>-1</sup> ) with tunneling | N/A          | 2.68E+02      |

Quantity terms are (in the order given in column one: zero-point energy, thermal energy correction term, partition coefficient, electronic energy, ideal gas constant time temperature (300K), Boltzmann constant times temperature (300 K) divided by Planck's constant, ZPE corrected energy barrier for the reaction, pre-exponential factor, Arrhenius activation barrier for the reaction, reaction rate constant.

**Structures used for B971-DCP calculations (Cartesian coordinates in Å) – see Table S1**

Table S1, #1

C -3.37129263 0.64707912 0.01053606

C -1.95003135 0.03794019 0.04913263

C -2.20262623 1.46851897 -0.49423127

H -4.06152842 0.21902421 -0.71392074

H -3.82677898 0.93194639 0.95743905  
H -1.71936920 -0.72254451 -0.69547979  
H -1.86308549 2.31038417 0.10680192  
H -2.07960834 1.60075392 -1.56742785  
C -1.20951560 -0.19430949 1.34823558  
O -0.37973594 -1.09243774 1.42780928  
C -1.53532443 0.68290338 2.57376904  
H -1.75294955 1.72540927 2.31156854  
H -2.42285706 0.27250374 3.07676795  
H -0.69294690 0.64047893 3.27049086

Table S2, #2

H 5.78120400 -5.77544000 3.25507000  
H 1.88719000 -5.73156000 3.21960600  
H -1.98737900 -5.70227900 3.16275600  
H -5.87370400 -5.65416900 3.10041200  
H 5.84693400 1.97089800 3.52189500  
H 1.98068600 2.03598600 3.49090500  
H -1.95020300 2.06639800 3.42740500  
H -5.78755000 2.08929400 3.36704300  
H 5.81303200 -2.20284800 3.38689800  
H -0.53706400 -3.22187600 4.20587900  
H -5.83703300 -2.08155000 3.23539700  
H 5.88989200 5.54562000 3.62411100  
H 1.99880400 5.57785400 3.58906600  
H -1.87688400 5.61176600 3.53717300  
H -5.76461100 5.66556300 3.46932000

Si 5.78687700 -5.16686500 1.89147900  
Si 1.90835900 -5.14176500 1.84700000  
Si -1.96153800 -5.09180900 1.79830100  
Si -5.83271900 -5.04468400 1.73755700  
Si 5.85546400 2.57857900 2.15726700  
Si 1.98794700 2.62246900 2.11842200  
Si -1.89229500 2.65808600 2.05903200  
Si -5.75222400 2.69752200 2.00332000  
Si 5.80647300 -2.71884400 1.98508900  
Si 1.93304300 -2.69100500 1.92001600  
Si -1.95304300 -2.62183300 1.89477900  
Si -5.80592100 -2.59763800 1.83544300  
Si 5.88524300 5.02701800 2.22372500  
Si 2.01016600 5.07234000 2.18281100  
Si -1.86241600 5.10848200 2.13011300  
Si -5.73473600 5.14592600 2.06964500  
Si 7.70596500 -5.66670900 0.58094800  
Si 3.85780700 -5.66871900 0.59183900  
Si -0.01928700 -5.63318200 0.54430400  
Si -3.88091400 -5.58692700 0.48840900  
Si -7.72890000 -5.50768600 0.37887100  
Si 7.77425500 2.01811600 0.86230000  
Si 3.92730500 2.02906600 0.86511700  
Si 0.06159200 2.06478100 0.82531400  
Si -3.80732300 2.10768800 0.75592600  
Si -7.64755000 2.17651600 0.65923200  
Si 7.73448900 -2.11539800 0.72625000

Si 3.89124000 -2.04122700 0.73566700  
Si 0.01780800 -2.00143200 0.68713300  
Si -3.85215600 -1.95973300 0.62795800  
Si -7.68775800 -1.95659700 0.52440700  
Si 7.81678800 5.57103400 0.94921200  
Si 3.96694100 5.64592600 0.95885800  
Si 0.09679200 5.68705000 0.91038500  
Si -3.77245100 5.72518600 0.85511200  
Si -7.61929500 5.73040500 0.74482100  
Si 7.72203700 -3.84015300 -0.86774500  
Si 3.88250100 -3.81086800 -0.85881700  
Si 0.02107000 -3.77458500 -0.90368000  
Si -3.83416100 -3.72858400 -0.96182000  
Si -7.67084000 -3.68116700 -1.07020100  
Si 7.79802000 3.84295600 -0.61598000  
Si 3.96089200 3.88765500 -0.61164100  
Si 0.09998300 3.92556700 -0.65492700  
Si -3.76147800 3.96771700 -0.71602500  
Si -7.59515400 4.00132600 -0.81912800  
Si 7.78454800 -0.00997600 -0.39526900  
Si 3.92155400 0.03282100 -0.46137200  
Si 0.06119300 0.07138800 -0.50758500  
Si -3.80771100 0.11211300 -0.56842900  
Si -7.66685800 0.14887600 -0.59931800  
Si 5.81444000 -3.79076900 -2.19230800  
Si 1.96822900 -3.75881400 -2.21264300  
Si -1.88788300 -3.71965600 -2.26743400

Si -5.72803800 -3.67077600 -2.34451900  
Si 5.89078200 3.91850300 -1.94027600  
Si 2.04642200 3.96520700 -1.96277800  
Si -1.80986600 4.00503200 -2.01414300  
Si -5.65379800 4.03788300 -2.09416500  
Si 5.87568300 0.05691700 -1.86101700  
Si 2.00871600 0.09871000 -1.91748300  
Si -1.85236400 0.13774000 -1.96728200  
Si -5.72141200 0.17785000 -2.01759800  
Si 5.91820800 1.99822200 -3.26505000  
Si 2.04777200 2.04790300 -3.31339400  
Si -1.81308900 2.08732900 -3.36421000  
Si -5.68430900 2.11854000 -3.41920200  
Si 5.88040200 -1.78917000 -3.38917000  
Si 2.00948700 -1.75817100 -3.43731900  
Si -1.85065900 -1.71787000 -3.48871200  
Si -5.72154400 -1.66907000 -3.54304800  
H 9.04348900 3.86895700 -1.40458200  
H 8.97945000 0.00777200 -1.30316800  
H 8.96714700 -3.83901000 -1.65708500  
H 7.11852000 2.02110300 -4.11450200  
H 7.08087200 -1.78005300 -4.23902200  
H -6.86066700 2.16561400 -4.29933500  
H -6.89831600 -1.63554300 -4.42385600  
H -8.81799800 4.05360000 -1.64074800  
H -8.83648400 0.19194500 -1.53873200  
H -8.89434100 -3.65436500 -1.89325000

H -7.59696500 7.06518300 0.04873300  
H -3.73741800 7.02530800 0.09979400  
H 0.12188000 6.98543700 0.15085200  
H 3.98117700 6.94551600 0.20184900  
H 7.84072600 6.90559500 0.25285200  
H -5.64696600 5.30352200 -2.85087300  
H -1.78741700 5.26364800 -2.79981200  
H 2.07252000 5.22374600 -2.74877600  
H 5.93206900 5.18382200 -2.69777400  
H -5.74787700 -4.88491200 -3.18463400  
H -1.88832800 -4.92483600 -3.13357600  
H 1.97160900 -4.96473800 -3.08254000  
H 5.83115900 -5.00461100 -3.03153600  
H -7.73422900 -6.79362200 -0.40526400  
H -3.87468100 -6.83354600 -0.35420600  
H -0.01538400 -6.87346700 -0.30315000  
H 3.84391400 -6.91333700 -0.25215000  
H 7.70346400 -6.95320900 -0.20114600  
H -3.00112100 2.12569100 -4.24827800  
H -4.46129900 2.14079600 -4.26762200  
H 0.85947100 2.08575800 -4.19706200  
H -0.60162400 2.10086200 -4.21638000  
H 4.71915200 2.04589400 -4.14623700  
H 3.25897200 2.06097600 -4.16550600  
H -3.03876800 -1.67541800 -4.37279600  
H -4.49894700 -1.66033200 -4.39214200  
H 0.82182500 -1.71531500 -4.32158000

H -0.63927200 -1.70021100 -4.34089900  
H 4.68150400 -1.75523600 -4.27075700  
H 3.22132500 -1.74013200 -4.29002500  
H 9.01658400 5.18779000 1.75363500  
H 8.98458900 2.35070700 1.66593700  
H 8.93630900 -2.52408600 1.50624600  
H 8.91210600 -5.36090400 1.40807300  
H -8.84734200 5.37246000 1.51743700  
H -8.87168800 2.53529800 1.42984100  
H -8.91997000 -2.33949600 1.27014800  
H -8.95182000 -5.17623400 1.17187500  
C -1.29538100 -2.50798000 4.57775700  
O -2.05968300 -1.99648500 3.45641400  
C -0.54562200 -1.35585300 5.28541000  
C 0.33888600 -0.33986300 4.46870200  
C -1.33834700 -0.12346500 5.86695600  
H 0.06432000 -1.80870800 6.08318600  
C -0.11156200 0.78029600 5.47594300  
H -0.08508000 -0.16282700 3.47148900  
H 1.41131200 -0.55417000 4.37494200  
H -2.21607900 0.10450100 5.24773000  
H -1.63487800 -0.15832100 6.92266200  
H -0.32327400 1.77495100 5.06736600  
H 0.59668800 0.88156600 6.30886700  
C -2.26146800 -3.24827100 5.53321900  
H -1.71502600 -3.65101700 6.39685500  
H -3.03332400 -2.55754400 5.89602500



H -2.75568300 -4.08046300 5.01721900

Table S3, #3

H 5.96822000 -5.68714500 2.26282500

H 2.06079400 -5.79365100 2.34644700

H -1.77473900 -5.93633300 2.39993300

H -5.68401000 -5.99674300 2.48115500

H 5.77468300 2.00373400 3.28174100

H 1.86542700 1.92883200 3.37878000

H -2.00395900 1.80923400 3.43290600

H -5.87042000 1.68063300 3.49333600

H 5.91357200 -2.16034000 2.72863800

H -0.60284000 -3.38471300 3.99099100

H -5.76099200 -2.45402100 2.95327700

H 5.68958200 5.54668700 3.72102200

H 1.79486700 5.43096900 3.80739300

H -2.07471400 5.31794400 3.87803200

H -5.96412800 5.22790500 3.93723500

Si 5.90119500 -4.95620600 0.96138500

Si 2.02218700 -5.06218200 1.04419700

Si -1.83381900 -5.17001500 1.11826500

Si -5.71063400 -5.26176000 1.18091100

Si 5.70633500 2.73430900 1.97980200

Si 1.82916400 2.63270900 2.06253300

Si -2.03573600 2.52241900 2.12433300

Si -5.89840200 2.41602200 2.19325600

Si 5.84672100 -2.53343900 1.28592200

Si 1.95603800 -2.61855400 1.35869100  
Si -1.92540200 -2.72131500 1.47420100  
Si -5.76405200 -2.83581700 1.51019300  
Si 5.65257800 5.16403800 2.27802900  
Si 1.77704900 5.06320500 2.35911100  
Si -2.09146200 4.95253100 2.42906700  
Si -5.96285000 4.84594500 2.49359200  
Si 7.79329600 -5.24929700 -0.44632900  
Si 3.94262300 -5.40210400 -0.31425600  
Si 0.07883000 -5.50533600 -0.24707600  
Si -3.78271200 -5.60865000 -0.17200400  
Si -7.63476400 -5.66655200 -0.15724200  
Si 7.59740000 2.37060600 0.57658800  
Si 3.75194200 2.22728600 0.70866300  
Si -0.11171900 2.12470900 0.77513700  
Si -3.97586000 2.01915600 0.83965100  
Si -7.81720300 1.95247300 0.86202200  
Si 7.70303200 -1.73032700 0.03555400  
Si 3.86270400 -1.81027200 0.17390800  
Si -0.02491100 -1.90918000 0.25839600  
Si -3.87542100 -2.01731700 0.30813400  
Si -7.71408200 -2.14666400 0.32987800  
Si 7.51869500 5.89866100 1.00251000  
Si 3.67063700 5.82361900 1.13882600  
Si -0.19817400 5.71999600 1.21104800  
Si -4.06503700 5.61333800 1.28067100  
Si -7.91148700 5.48072800 1.28950600

Si 7.69531600 -3.29421000 -1.71309900  
Si 3.85908500 -3.41394700 -1.58056900  
Si -0.00171300 -3.51449800 -1.50156000  
Si -3.85363000 -3.62246000 -1.44085600  
Si -7.69220600 -3.70968600 -1.42338900  
Si 7.50743400 4.32766400 -0.71984500  
Si 3.67178900 4.21823900 -0.58870100  
Si -0.18699800 4.11669200 -0.51637200  
Si -4.04656900 4.01122300 -0.44974700  
Si -7.88040300 3.91038800 -0.43330900  
Si 7.63663600 0.47476900 -0.87395400  
Si 3.77792900 0.37106900 -0.81167400  
Si -0.08532000 0.26630500 -0.73840000  
Si -3.94838000 0.16238500 -0.67594200  
Si -7.80622500 0.05545600 -0.58665800  
Si 5.74032300 -3.19025100 -2.96568900  
Si 1.89847700 -3.30425200 -2.86627700  
Si -1.95415000 -3.40858500 -2.79795100  
Si -5.79555700 -3.50301400 -2.75099500  
Si 5.55251200 4.45656700 -1.96984000  
Si 1.71193300 4.35675200 -1.87094100  
Si -2.14442600 4.25277600 -1.80009200  
Si -5.98575700 4.14432000 -1.75769300  
Si 5.67706200 0.61144600 -2.26414000  
Si 1.81395400 0.50594900 -2.19390900  
Si -2.04578200 0.40320900 -2.12505900  
Si -5.91128100 0.29639700 -2.05153700

Si 5.60414400 2.67593800 -3.47699600  
Si 1.73529700 2.57861900 -3.40103300  
Si -2.12422100 2.47507200 -3.33005800  
Si -5.99340600 2.36106600 -3.26214700  
Si 5.69620600 -1.08096100 -3.96429400  
Si 1.82805900 -1.19483900 -3.89072900  
Si -2.03112000 -1.29871700 -3.81974000  
Si -5.90045500 -1.39622700 -3.74959400  
H 8.72323000 4.47782000 -1.54069900  
H 8.79967600 0.62500800 -1.81114700  
H 8.91166500 -3.16800500 -2.53477300  
H 6.77317300 2.82421900 -4.35612400  
H 6.86609900 -0.94629100 -4.84634900  
H -7.20045400 2.44606100 -4.09635900  
H -7.10752900 -1.32445100 -4.58658300  
H -9.13115200 3.99463700 -1.20879200  
H -9.00917000 0.14306000 -1.48008700  
H -8.94271800 -3.65118600 -2.20286700  
H -7.96044800 6.87603500 0.72560700  
H -4.10243600 6.98046300 0.65391900  
H -0.24467300 7.08488400 0.58223700  
H 3.61308800 7.18926200 0.51049000  
H 7.47110200 7.29364900 0.43874100  
H -6.04982100 5.47584100 -2.38929600  
H -2.19180800 5.58027000 -2.46098400  
H 1.66659400 5.68468700 -2.53271000  
H 5.52460700 5.78907100 -2.60446100

H -5.80074900 -4.63045400 -3.70327100  
H -1.94273200 -4.52607600 -3.77496600  
H 1.91567000 -4.42165800 -3.84669300  
H 5.77368200 -4.31722300 -3.91843500  
H -7.62164600 -6.87104100 -1.06172500  
H -3.76363200 -6.76666300 -1.13341900  
H 0.09413200 -6.66229000 -1.20510800  
H 3.95189300 -6.55786100 -1.27684800  
H 7.80990500 -6.45342700 -1.34859200  
H -3.34244100 2.55044100 -4.16805500  
H -4.80204000 2.51095500 -4.14095800  
H 0.51662200 2.65483600 -4.23962500  
H -0.94389300 2.61531200 -4.21247500  
H 4.37475900 2.75930200 -4.31155100  
H 2.91516200 2.71978600 -4.28438100  
H -3.24951600 -1.22002300 -4.65827200  
H -4.70911500 -1.25952800 -4.63117800  
H 0.60954600 -1.11559300 -4.72983900  
H -0.85097000 -1.15511700 -4.70268800  
H 4.46768400 -1.01118300 -4.80177200  
H 3.00808600 -1.05067800 -4.77459900  
H 8.75793000 5.48707400 1.72955800  
H 8.82357700 2.67221400 1.36900200  
H 8.94275100 -2.16327900 0.74031300  
H 9.01581100 -4.97657600 0.36912200  
H -9.09889000 5.00382800 2.06151000  
H -9.02559700 2.18917400 1.70081200

H -8.90642400 -2.64631900 1.07212300  
H -8.84100800 -5.45982200 0.70107400  
C -1.53309400 -2.85252000 4.25411600  
O -2.05664600 -2.20431000 3.06768500  
C -1.19388300 -1.77586200 5.31074800  
C -0.25264700 -0.56346200 4.96441600  
C -2.29902900 -0.73843400 5.74820900  
H -0.80499100 -2.30258900 6.19693300  
C -1.16082500 0.33944500 5.87675900  
H -0.33329300 -0.29085000 3.90505300  
H 0.80533700 -0.66233800 5.23021800  
H -2.97179700 -0.51306300 4.91024200  
H -2.89298800 -0.96773700 6.64202900  
H -1.38403400 1.35486700 5.52804500  
H -0.77311200 0.39602600 6.90283600  
C -2.58565100 -3.85163700 4.79706600  
H -2.20352100 -4.35974700 5.69299300  
H -3.50705600 -3.31744300 5.06289800  
H -2.83168700 -4.61652800 4.05164900  
C 2.92784500 -2.06758400 3.89713600  
O 1.88476300 -2.09914400 2.98224200  
C 3.40818100 -3.39981300 4.40536000  
C 4.41946900 -3.47586800 5.61059300  
C 2.41009300 -4.30779600 5.24843700  
H 3.80039600 -4.01788600 3.57279800  
C 3.62960200 -4.72502400 6.14898800  
H 4.30829600 -2.61533400 6.28352400

H 5.48100600 -3.60401200 5.36560800  
H 1.68574000 -3.68877200 5.79418600  
H 1.87726800 -5.10016100 4.70906400  
H 3.45980500 -4.78070500 7.23073000  
H 4.07968800 -5.66757800 5.81194200  
C 3.60786200 -0.73240400 4.06995700  
H 4.38778200 -0.78236200 4.83822200  
H 4.08628600 -0.38825500 3.13396000  
H 2.88587100 0.04787700 4.35446600

Table S4, #4

H 5.99904100 -5.60951400 2.17194000  
H 2.13178300 -5.76806100 2.30485200  
H -1.72601900 -5.96225500 2.40408300  
H -5.62436100 -6.07513100 2.52499900  
H 5.73528400 2.06506400 3.22980700  
H 1.86462700 1.94881800 3.37510300  
H -2.06689800 1.80086700 3.46861100  
H -5.89574100 1.60182100 3.56551400  
H 5.01896000 -2.16112000 2.68632100  
H -0.25699500 -3.35946600 3.65860900  
H -5.74799700 -2.53644800 3.01721600  
H 5.61248100 5.60729600 3.68951200  
H 1.72633300 5.44717800 3.81620400  
H -2.14815300 5.29076700 3.92524900  
H -6.03245500 5.14591200 4.02411600  
Si 5.91794000 -4.84782500 0.88788600

Si 2.06977700 -5.03649500 1.00218200  
Si -1.79698800 -5.20176800 1.11920200  
Si -5.67263300 -5.33332800 1.22958100  
Si 5.64886900 2.80272500 1.93243500  
Si 1.78338300 2.65509900 2.06191300  
Si -2.09549700 2.50890100 2.15941000  
Si -5.94901700 2.34172500 2.26889600  
Si 5.76685900 -2.43000700 1.26521300  
Si 2.09857800 -2.59214500 1.31027900  
Si -1.90180300 -2.76614900 1.50658000  
Si -5.75227600 -2.91008900 1.57244100  
Si 5.56676700 5.23115900 2.24496500  
Si 1.69774100 5.08400200 2.36684300  
Si -2.17301900 4.93300900 2.47446800  
Si -6.04141200 4.76910700 2.57912300  
Si 7.80733700 -5.13585800 -0.53240400  
Si 3.97179400 -5.33967600 -0.38043700  
Si 0.11001900 -5.49709900 -0.25667600  
Si -3.75566500 -5.64963300 -0.14631800  
Si -7.60537600 -5.75574400 -0.09118600  
Si 7.53173200 2.47356000 0.51191300  
Si 3.68983000 2.27352800 0.67721400  
Si -0.17120000 2.13027600 0.80138900  
Si -4.03709700 1.97756200 0.89156100  
Si -7.87517800 1.85656900 0.95655000  
Si 7.65707300 -1.61725200 0.00964900  
Si 3.87694600 -1.76720600 -0.00834800



Si 0.01004300 -1.89596100 0.33829100  
Si -3.87622500 -2.06010200 0.36717300  
Si -7.72266000 -2.23983700 0.40969900  
Si 7.41007700 5.99827200 0.95477400  
Si 3.56645100 5.87254600 1.12824000  
Si -0.29893200 5.72155300 1.24269600  
Si -4.16684300 5.56520100 1.34897700  
Si -8.01010500 5.38214900 1.39728700  
Si 7.67560100 -3.16973400 -1.77642900  
Si 3.84533200 -3.38391900 -1.69062200  
Si 0.00251900 -3.48439500 -1.47300400  
Si -3.85834000 -3.65471600 -1.39887500  
Si -7.69987000 -3.79556200 -1.35022200  
Si 7.40122600 4.43442200 -0.77302600  
Si 3.56958400 4.27310700 -0.60510500  
Si -0.28658000 4.12329300 -0.48887000  
Si -4.14580600 3.97138000 -0.38884200  
Si -7.97643500 3.81799600 -0.33111500  
Si 7.57825300 0.57902800 -0.93676000  
Si 3.72132800 0.44062700 -0.87419000  
Si -0.12959000 0.26784900 -0.70788000  
Si -3.99506600 0.11958400 -0.62115700  
Si -7.85397500 -0.03569500 -0.49852300  
Si 5.72370600 -3.09894300 -3.03779100  
Si 1.85900900 -3.26260700 -2.89963600  
Si -1.96951500 -3.41554600 -2.76993900  
Si -5.81658700 -3.55988700 -2.69360100

Si 5.43281000 4.54165500 -2.00359000  
Si 1.59396700 4.39210100 -1.86471200  
Si -2.25844300 4.23786800 -1.75475800  
Si -6.09949800 4.08084300 -1.67488300  
Si 5.61042500 0.70577000 -2.32040200  
Si 1.73467200 0.54807700 -2.20698100  
Si -2.10739300 0.38443500 -2.08456000  
Si -5.97482000 0.23253100 -1.97944400  
Si 5.49256400 2.76911400 -3.51865500  
Si 1.62259800 2.62136700 -3.40257900  
Si -2.23064800 2.46230700 -3.28879100  
Si -6.09825900 2.30136200 -3.18390700  
Si 5.62707800 -0.98566200 -4.01957900  
Si 1.75904200 -1.14864100 -3.90671900  
Si -2.09459500 -1.30655100 -3.79276400  
Si -5.96244700 -1.45223200 -3.68567000  
H 8.60648100 4.60190400 -1.60528200  
H 8.72935200 0.75132400 -1.89003400  
H 8.88236900 -3.03747300 -2.62808900  
H 6.64904100 2.93300700 -4.40652200  
H 6.78509400 -0.83432300 -4.91091700  
H -7.31523600 2.37507700 -4.00597700  
H -7.17918400 -1.39225500 -4.51037100  
H -9.23595300 3.88902300 -1.09349700  
H -9.06757700 0.04026400 -1.37955500  
H -8.96006700 -3.75035200 -2.11630600  
H -8.08243900 6.77861100 0.83901000

H -4.22700900 6.93267300 0.72845400  
H -0.37182800 7.08672400 0.61790600  
H 3.48335200 7.24073300 0.50729400  
H 7.33878400 7.39475300 0.39667600  
H -6.18600700 5.41354700 -2.30006700  
H -2.33057600 5.56761000 -2.41062300  
H 1.52524400 5.72166500 -2.52122100  
H 5.38067600 5.87568300 -2.63184000  
H -5.82134000 -4.68422500 -3.65202100  
H -1.96590400 -4.53021300 -3.76258500  
H 1.88991600 -4.37615700 -3.87318400  
H 5.74534600 -4.22208800 -3.98379400  
H -7.58639900 -6.95687200 -0.99998400  
H -3.73096600 -6.80286000 -1.11054600  
H 0.12421700 -6.64885700 -1.22110100  
H 3.97939600 -6.49479700 -1.33170700  
H 7.83482600 -6.34072900 -1.44231900  
H -3.45980400 2.52909100 -4.11654200  
H -4.91842600 2.47082700 -4.07474000  
H 0.39667900 2.68313200 -4.22699100  
H -1.06285800 2.62481900 -4.18512600  
H 4.25223200 2.83723400 -4.33778600  
H 2.79361200 2.77894000 -4.29591100  
H -3.32375200 -1.23819300 -4.62092800  
H -4.78237500 -1.29647600 -4.57912900  
H 0.53272900 -1.08411700 -4.73137400  
H -0.92680900 -1.14243100 -4.68950900

H 4.38828300 -0.93007100 -4.84217600  
H 2.92966200 -0.98834400 -4.80029800  
H 8.66169500 5.60044500 1.66798000  
H 8.75959400 2.78789300 1.29688400  
H 8.93407600 -2.04352200 0.65002300  
H 9.03925800 -4.85438100 0.26822200  
H -9.18317600 4.88747000 2.17983400  
H -9.07763600 2.07522200 1.80851900  
H -8.90315500 -2.75619300 1.16165800  
H -8.80561100 -5.56735600 0.78007600  
C -1.12162200 -2.87982000 4.15278900  
O -2.02437200 -2.36395500 3.13809700  
C -0.58685500 -1.71935500 5.02318100  
C -0.05157700 -0.39497300 4.36526300  
C -1.58616600 -0.83948900 5.86893900  
H 0.18466800 -2.14109600 5.68700300  
C -0.65136900 0.39292300 5.58622400  
H -0.60563400 -0.17355900 3.44377300  
H 1.02129600 -0.32228700 4.16872100  
H -2.54943100 -0.73502000 5.35173900  
H -1.76247500 -1.12435200 6.91387000  
H -1.13162500 1.35810800 5.38695600  
H 0.09235200 0.52668100 6.38380500  
C -1.87257900 -3.93203500 5.00356800  
H -1.21094200 -4.33405900 5.78345500  
H -2.74337900 -3.47129500 5.48704700  
H -2.22089300 -4.76552900 4.38287500

C 3.61707400 -2.21339900 3.64652000  
 O 2.43779700 -2.06783500 2.90673200  
 C 3.80679700 -3.61190200 4.21483300  
 C 5.04230600 -3.96397700 5.12548000  
 C 2.85419300 -4.12076900 5.38182800  
 H 3.75523700 -4.33674400 3.38973100  
 C 4.09255900 -4.87525100 5.98914800  
 H 5.39714700 -3.09828200 5.69872700  
 H 5.89869400 -4.43914800 4.63229600  
 H 2.52183800 -3.29404300 6.02365300  
 H 1.98319600 -4.71645900 5.08196400  
 H 4.21777500 -4.83698200 7.07767400  
 H 4.12851600 -5.92261500 5.66387200  
 C 3.88307100 -0.97684000 4.49483600  
 H 4.88152400 -1.01380800 4.94514600  
 H 3.81549100 -0.07675700 3.87134800  
 H 3.14063200 -0.87966300 5.30512500

Table S5, #5

H 5.93369400 -5.73791400 2.29810000  
 H 2.02343600 -5.85879100 2.33527200  
 H -1.81252100 -5.92259300 2.40342600  
 H -5.72165100 -5.95705100 2.46423100  
 H 5.79111000 1.96758700 3.29689900  
 H 1.86789900 1.93889100 3.37868900  
 H -1.99305600 1.82599500 3.40901000  
 H -5.85728700 1.72310800 3.45542000

H 5.91743100 -2.20041000 2.75946700  
H -0.64730300 -3.35396700 4.01114500  
H -5.77523100 -2.41244800 2.92634500  
H 5.72655100 5.50985000 3.72648400  
H 1.83022400 5.42633000 3.79417400  
H -2.03944900 5.33521100 3.84826700  
H -5.92899700 5.27245600 3.89049600  
Si 5.87788900 -5.00360000 0.99849800  
Si 2.00126800 -5.10405200 1.04942100  
Si -1.85945300 -5.16100100 1.11821700  
Si -5.73708000 -5.22547200 1.16189100  
Si 5.73252500 2.69359700 1.99219900  
Si 1.85097000 2.62869200 2.05594900  
Si -2.01277400 2.53632400 2.09939600  
Si -5.87517100 2.45573400 2.15358400  
Si 5.84224700 -2.58128700 1.32078000  
Si 1.95512300 -2.66676800 1.39518100  
Si -1.93872900 -2.71054700 1.46561800  
Si -5.77493400 -2.79841400 1.48438500  
Si 5.69401500 5.12379200 2.28428900  
Si 1.81656000 5.05675100 2.34634000  
Si -2.05266300 4.96674700 2.40003700  
Si -5.92433700 4.88673300 2.44787200  
Si 7.77278400 -5.31310600 -0.40257400  
Si 3.92662400 -5.43923300 -0.29159500  
Si 0.05578200 -5.51326800 -0.24172400  
Si -3.80535600 -5.58957300 -0.18092400

Si -7.65807000 -5.62033200 -0.18374700  
Si 7.62702000 2.31062500 0.59840100  
Si 3.77895000 2.19675900 0.71468300  
Si -0.08518900 2.12264800 0.76134600  
Si -3.95032400 2.04232700 0.80848700  
Si -7.79146000 2.00235900 0.81532700  
Si 7.70502000 -1.79351400 0.06907300  
Si 3.86340800 -1.85113400 0.20344200  
Si -0.01413600 -1.91920000 0.27694900  
Si -3.87632000 -1.99663400 0.28667700  
Si -7.71492700 -2.09871600 0.29389700  
Si 7.57112800 5.84110900 1.01511800  
Si 3.72242700 5.79419100 1.13358500  
Si -0.14917200 5.71798900 1.18807400  
Si -4.01617800 5.63782900 1.24104400  
Si -7.86295000 5.53236100 1.23341300  
Si 7.69584400 -3.36074900 -1.67538800  
Si 3.85690700 -3.45180200 -1.55728100  
Si -0.00175300 -3.52144500 -1.49320700  
Si -3.85655600 -3.60688900 -1.45656000  
Si -7.69600000 -3.66643700 -1.45516900  
Si 7.55664000 4.26522100 -0.70291100  
Si 3.71979700 4.18390200 -0.58975100  
Si -0.14058900 4.11058200 -0.53578000  
Si -4.00091600 4.03150200 -0.48565500  
Si -7.83515400 3.95734500 -0.48518800  
Si 7.65984700 0.40955700 -0.84618100

Si 3.79786500 0.33004200 -0.79658000  
Si -0.06103200 0.25298100 -0.73870300  
Si -3.92831100 0.18108300 -0.70142400  
Si -7.78722600 0.10165700 -0.62858200  
Si 5.74681800 -3.24511700 -2.93625700  
Si 1.90405800 -3.33200900 -2.85422100  
Si -1.94788600 -3.40821400 -2.80312400  
Si -5.79197800 -3.47650000 -2.77484500  
Si 5.60870100 4.40488300 -1.96258500  
Si 1.76671800 4.33251400 -1.88102200  
Si -2.09111400 4.25580100 -1.82780500  
Si -5.93326700 4.17464800 -1.80191600  
Si 5.70603300 0.55636800 -2.24362700  
Si 1.84308600 0.47862900 -2.19101800  
Si -2.01477000 0.40269100 -2.13894200  
Si -5.88406600 0.32557300 -2.08589200  
Si 5.65376900 2.61902600 -3.46398000  
Si 1.78430300 2.54940900 -3.40538000  
Si -2.07565100 2.47284200 -3.35163400  
Si -5.94635400 2.38766600 -3.30167400  
Si 5.72182700 -1.13887200 -3.94170400  
Si 1.85280800 -1.22520600 -3.88535800  
Si -2.00717600 -1.30147600 -3.83174800  
Si -5.87756200 -1.37159400 -3.77920000  
H 8.77698300 4.40531000 -1.51874800  
H 8.82753300 0.55137400 -1.77907500  
H 8.91609300 -3.24417700 -2.49256400



H 6.82807700 2.75822700 -4.33878800  
H 6.89667900 -1.01408900 -4.81902100  
H -7.14889700 2.47892800 -4.14145200  
H -7.08029600 -1.29339100 -4.62168600  
H -9.08167600 4.04844100 -1.26661000  
H -8.98557800 0.19541800 -1.52758000  
H -8.94256500 -3.60104500 -2.24042600  
H -7.89947400 6.92650100 0.66576500  
H -4.04053800 7.00363400 0.61131400  
H -0.18185100 7.08076300 0.55686700  
H 3.67683400 7.15784800 0.50235600  
H 7.53577200 7.23494100 0.44784400  
H -5.98469400 5.50492200 -2.43687800  
H -2.12575700 5.58205700 -2.49132900  
H 1.73356900 5.65917700 -2.54581700  
H 5.59250600 5.73626700 -2.60033100  
H -5.80081900 -4.60621500 -3.72407300  
H -1.94187800 -4.52913100 -3.77853200  
H 1.91744700 -4.45200900 -3.83302000  
H 5.77638400 -4.37486800 -3.88752600  
H -7.64935600 -6.82716200 -1.08514100  
H -3.79041900 -6.75007800 -1.13959800  
H 0.06826900 -6.67299700 -1.19405200  
H 3.92695400 -6.59586000 -1.24855600  
H 7.78589000 -6.51872000 -1.30306300  
H -3.28996000 2.55601400 -4.19591200  
H -4.74990800 2.52685400 -4.17533600

H 0.57002600 2.63310800 -4.25024000  
H -0.89083800 2.60391700 -4.22961600  
H 4.42908800 2.71027800 -4.30493000  
H 2.96914100 2.68108800 -4.28428100  
H -3.22135900 -1.21625700 -4.67613800  
H -4.68130700 -1.24543600 -4.65556600  
H 0.63862700 -1.13912800 -4.73046400  
H -0.82223900 -1.16831900 -4.70983800  
H 4.49768900 -1.06201300 -4.78516000  
H 3.03774100 -1.09118200 -4.76450800  
H 8.80400900 5.42269000 1.74906200  
H 8.85147200 2.60652100 1.39594800  
H 8.93945200 -2.23128800 0.78007100  
H 8.99438700 -5.04597200 0.41635200  
H -9.05708800 5.06577600 2.00123500  
H -9.00197600 2.24975800 1.64801300  
H -8.91399800 -2.58805100 1.03213600  
H -8.86670800 -5.40288800 0.66852400  
C -1.57878200 -2.81382500 4.25492100  
O -2.08461300 -2.18117000 3.05401500  
C -1.24668500 -1.72179700 5.29802100  
C -0.27450000 -0.53420200 4.94980400  
C -2.33992100 -0.65439900 5.69096700  
H -0.89171900 -2.23639900 6.20518700  
C -1.18092800 0.39943200 5.83228000  
H -0.33337000 -0.27805100 3.88472000  
H 0.77702700 -0.64499800 5.23566900

H -2.98563700 -0.42746600 4.83239600  
H -2.96072800 -0.85738200 6.57266400  
H -1.37295500 1.41616300 5.46977200  
H -0.81284100 0.45654200 6.86549700  
C -2.64157600 -3.80152700 4.79864300  
H -2.27626100 -4.29208900 5.71121100  
H -3.56731700 -3.26196300 5.03709100  
H -2.87419800 -4.58073500 4.06359800  
C 3.04583300 -2.04909400 3.82863100  
O 1.90569900 -2.23161800 3.04600500  
C 3.60513800 -0.64205000 3.80982100  
H 4.52436800 -0.57731300 4.40319500  
H 3.83315000 -0.31056300 2.78594600  
H 2.87320000 0.07000500 4.22066900  
C 3.41415300 -3.00457200 4.78753500  
C 2.91409900 -4.46625200 4.85523000  
C 2.69643800 -4.54436600 6.39715000  
C 2.39934900 -3.05213700 6.62315900  
H 4.39845500 -2.83256600 5.22938800  
H 1.95299900 -4.55005200 4.33444300  
H 3.62561100 -4.83346600 6.90717800  
H 1.90517300 -5.23728400 6.71941900  
H 2.89728900 -2.50055800 7.42237800  
H 1.39040000 -2.70926500 6.39122900  
H 3.60626900 -5.20391700 4.42173400

**Structures used for CBS-QB3 calculations (Cartesian coordinates in Å) – see Table S2**

Table S2, #1

Si 1.83875395 -2.65946610 1.62525328  
C 3.00871354 -2.05242544 3.98791675  
O 1.81796533 -2.21848529 3.27719308  
C 3.55011587 -0.63889812 4.01393324  
H 4.54635062 -0.61317888 4.47267224  
H 3.62620200 -0.21705157 3.00172884  
H 2.89261738 0.03530412 4.59116384  
C 3.25451747 -2.97041478 5.15647078  
C 2.72232180 -4.45197013 5.17380238  
C 2.45342915 -4.30717005 6.71540835  
C 2.47920987 -2.74713255 6.54246805  
H 4.33458618 -2.95864065 5.37073946  
H 1.78161046 -4.53545549 4.61745711  
H 3.30233434 -4.66307192 7.31346622  
H 1.53207269 -4.75443991 7.10820192  
H 2.98870008 -2.14828521 7.30744563  
H 1.47598385 -2.34123847 6.36867116  
H 3.41039734 -5.23806705 4.83805577  
H 0.62281539 -2.20009323 0.93868939  
H 1.86419222 -4.11560371 1.42546299  
H 3.01245094 -2.16264876 0.89278626

Table S2, #2

Si 1.95946779 -2.63059937 1.40380093  
C 2.76687294 -1.98463613 4.02667809  
O 1.81535151 -2.18451920 3.04044635

C 3.52465710 -0.67574240 3.95239882  
H 4.32633873 -0.64788132 4.69939623  
H 3.97682725 -0.51579630 2.96212102  
H 2.84746021 0.17170500 4.13480253  
C 2.96386786 -2.95586825 5.01909184  
C 4.15755720 -4.63653424 4.62912829  
C 3.06538820 -5.25092281 5.52076041  
C 1.99954415 -4.12973912 5.32249670  
H 3.54285369 -2.60477810 5.87644171  
H 4.06901935 -4.81495100 3.55773752  
H 3.39837247 -5.29376497 6.56690388  
H 2.73583830 -6.25932618 5.23008846  
H 1.32723387 -3.94213551 6.17408603  
H 1.38283457 -4.33903216 4.44038327  
H 5.18393294 -4.54233256 4.98777911  
H 1.99968433 -4.08606666 1.20156935  
H 0.74571103 -2.18244313 0.70605419  
H 3.13680647 -2.12878010 0.68064739

Table S2, #3

H 5.80643418 -5.73905442 2.53998754  
H 5.81718766 -2.20772069 2.99524224  
Si 5.75498217 -5.00726074 1.23867473  
Si 5.72225554 -2.58502736 1.55685188  
Si 1.83875395 -2.65946610 1.62525328  
Si 7.58758178 -1.80243950 0.30385810  
Si 3.74777117 -1.85139310 0.43389625

H 8.82129926 -2.23919292 1.01685179  
C 3.00871354 -2.05242544 3.98791675  
O 1.81796533 -2.21848529 3.27719308  
C 3.55011587 -0.63889812 4.01393324  
H 4.54635062 -0.61317888 4.47267224  
H 3.62620200 -0.21705157 3.00172884  
H 2.89261738 0.03530412 4.59116384  
C 3.25451747 -2.97041478 5.15647078  
H 4.33458618 -2.95864065 5.37073946  
H 2.89281019 -3.97735524 5.16825022  
H 2.73723596 -2.82144195 6.08120152  
H 6.92753728 -5.20195714 0.37374246  
H 4.54970961 -5.27553954 0.44102534  
H 3.74296948 -2.84316110 -0.65112595  
H 7.58153417 -2.78687222 -0.78781752  
H 7.56251615 -0.44625459 -0.26274072  
H 3.70967281 -0.51691676 -0.18142596  
H 1.86419222 -4.11560371 1.42546299  
H 0.62281539 -2.20009323 0.93868939

Table S2, #4

H 6.01452461 -5.68995502 2.19958201  
H 5.07349818 -2.22754052 2.69225039  
Si 5.95624696 -4.93181029 0.91219609  
Si 5.83230801 -2.51094882 1.27977392  
Si 2.16198263 -2.62607263 1.28791444  
Si 7.74544580 -1.72681491 0.04084049

Si 3.96408732 -1.82854941 -0.01526167  
H 9.01030711 -2.16710346 0.69566464  
C 3.66136350 -2.25853858 3.63824974  
O 2.49163275 -2.10052895 2.88596583  
C 3.82737456 -3.65734405 4.21320114  
H 3.77493138 -4.38436401 3.39007399  
C 3.93453075 -1.02250280 4.48504917  
H 4.92779662 -1.07063409 4.94565779  
H 3.88482629 -0.12382731 3.85786087  
H 3.18519424 -0.91300572 5.28737823  
H 7.12913544 -5.12758556 0.04795963  
H 7.75588948 -2.69510762 -1.06514330  
H 4.75565804 -5.22365799 0.11575955  
H 7.72022048 -0.37909573 -0.54560363  
H 3.94191205 -2.85042602 -1.07175420  
H 3.89078000 -0.46373410 -0.55637646  
H 0.89788345 -2.18665103 0.67975169  
H 2.12799780 -4.08473203 1.10886755  
H 3.17404997 -3.98880075 4.99307513  
H 4.65742054 -3.90509931 4.84132612

Example of optimized structure used to obtain vibration data: Addition product of CBMK on silicon. The P atoms in the cluster represent the quantum capping potentials.

H -2.972359174424 2.569208975455 -1.026722467290  
C -0.364584919529 4.097515784161 -1.826702806641  
Si 1.339144426199 2.228520393016 -0.831717389449

Si -2.506485600648 1.241668995360 -0.530285581467  
Si 1.690220436461 0.542503655128 -2.554385153173  
Si -2.164359498919 -0.390557248868 -2.291830055108  
Si 3.376909914876 2.284569657425 0.413745118393  
Si -0.375992309996 1.272648053555 0.546296838326  
Si -4.068863101393 0.222408068396 0.974828646197  
Si 3.876576375386 -0.338726920163 -2.143127881170  
Si 0.091274856676 -1.123208761581 -1.958262301582  
Si -3.586551239090 -2.229344183125 -1.716726998170  
Si 4.064401151693 -0.001842857343 0.215955561876  
Si 0.236606235790 -1.052670015623 0.438783744495  
Si -3.586632832098 -2.098303312036 0.672155682916  
Si 2.444880624017 -1.419065112931 1.269822466379  
Si -1.362377389018 -2.497405840886 1.470400962929  
P -0.433463045109 2.166961177141 2.747631042047  
P 3.029147157828 2.970625958727 2.655488695282  
P -3.736219399056 0.953048020307 3.205444876785  
P -6.304235968123 0.715211458417 0.354628044770  
P -1.269146671756 -2.185001762158 3.820553068493  
P -5.123407774770 -3.563989716713 1.713666435614  
P 2.423131533323 -1.057475977765 3.615103689508  
P 3.026556106371 -3.690727248567 0.911594814254  
P -0.720654626680 -4.739366480039 1.030053232464  
P -2.740047099795 -4.283334577136 -2.543091029501  
P 0.521648803135 -3.248287002555 -2.933579020075  
P 4.036474665248 -2.621140640729 -2.768744723041  
P -5.777284121420 -1.924018782106 -2.570534350598



P 4.945927650069 3.740606630473 -0.602998548612  
 P 5.527543703649 0.884226220423 -3.325607973556  
 P 6.219506439849 -0.418337515645 1.098498977840  
 H 1.510376015274 1.072787035805 -3.940222142150  
 H -2.409214852619 0.152742560371 -3.662672645061  
 O 0.929707683430 3.769733913399 -1.429592584498  
 C -0.947409249879 5.301095159139 -1.141782939383  
 C -0.848826696769 5.439173955418 0.430764910908  
 C -0.194096823457 6.710366069268 -1.242315174840  
 H -1.990381403793 5.420914386570 -1.468473656591  
 C -0.580316597569 6.977900920798 0.256005330444  
 H 0.037460478365 4.918544744526 0.813185852468  
 H -1.727816590944 5.129703964269 1.010204217604  
 H 0.885641755423 6.559194410884 -1.365033420782  
 H -0.555816844180 7.414040788438 -2.002620343555  
 H 0.186358542195 7.428764480798 0.898005066155  
 H -1.503218574317 7.566885522028 0.340324888049  
 C -0.743934014705 3.708663170386 -3.240978266966  
 H -1.802404598551 3.927584826661 -3.428609268657  
 H -0.142272713057 4.260386442767 -3.987268178738  
 H -0.577398743594 2.638094986459 -3.427888453542

## References

(S1) Frisch, M. J.; Trucks, G. W.; Schlegel, H. B.; Scuseria, G. E.; Robb, M. A.; Cheese-  
 man, J. R.; Montgomery, J. A., Jr.; Vreven, T.; Kudin, K. N.; Burant, J. C.; Millam, J. M.;  
 Iyengar, S. S.; Tomasi, J.; Barone, V.; Mennucci, B.; Cossi, M.; Scalmani, G.; Rega, N.;  
 Petersson, G. A.; Nakatsuji, H.; Hada, M.; Ehara, M.; Toyota, K.; Fukuda, R.; Hasegawa, J.;

Ishida, M.; Nakajima, T.; Honda, Y.; Kitao, O.; Nakai, H.; Klene, M.; Li, X.; Knox, J. E.; Hratchian, H. P.; Cross, J. B.; Bakken, V.; Adamo, C.; Jaramillo, J.; Gomperts, R.; Stratmann, R. E.; Yazyev, O.; Austin, A. J.; Cammi, R.; Pomelli, C.; Ochterski, J. W.; Ayala, P. Y.; Morokuma, K.; Voth, G. A.; Salvador, P.; Dannenberg, J. J.; Zakrzewski, V. G.; Dapprich, S.; Daniels, A. D.; Strain, M. C.; Farkas, O.; Malick, D. K.; Rabuck, A. D.; Raghavachari, K.; Foresman, J. B.; Ortiz, J. V.; Cui, Q.; Baboul, A. G.; Clifford, S.; Cioslowski, J.; Stefanov, B. B.; Liu, G.; Liashenko, A.; Piskorz, P.; Komaromi, I.; Martin, R. L.; Fox, D. J.; Keith, T.; Al-Laham, M. A.; Peng, C. Y.; Nanayakkara, A.; Challacombe, M.; Gill, P. M. W.; Johnson, B.; Chen, W.; Wong, M. W.; Gonzalez, C.; Pople, J. A. Gaussian 03, Revision D.01. Gaussian, Inc., Pittsburgh, PA, 2004.
