# Supplementary material
Source: publisher figshare collection journal article supplement (https://acs.figshare.com/ndownloader/files/4144945)

(a)

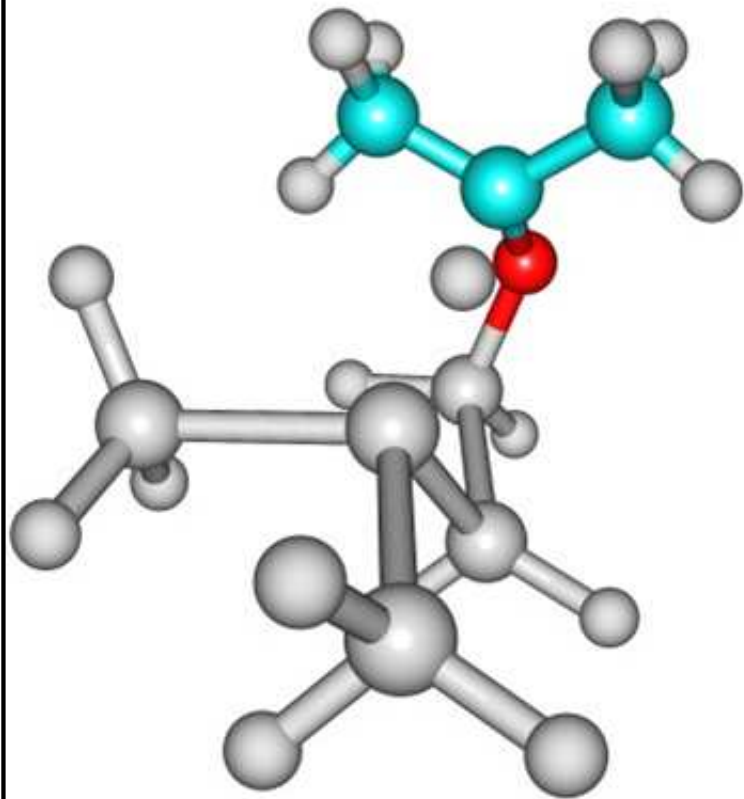

(b)

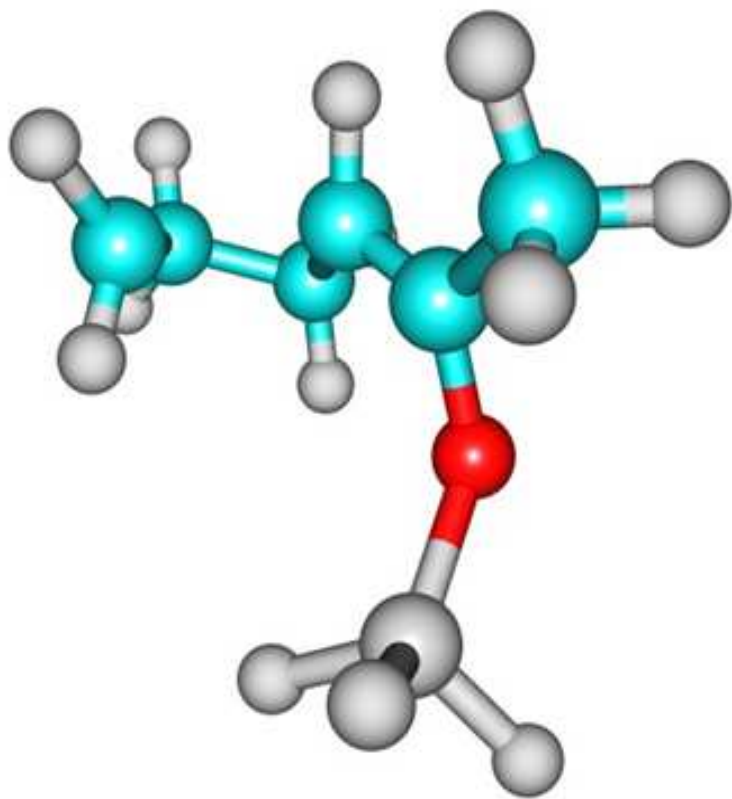

Supplement: Supplementary file 1 [file 4144945]

(a)

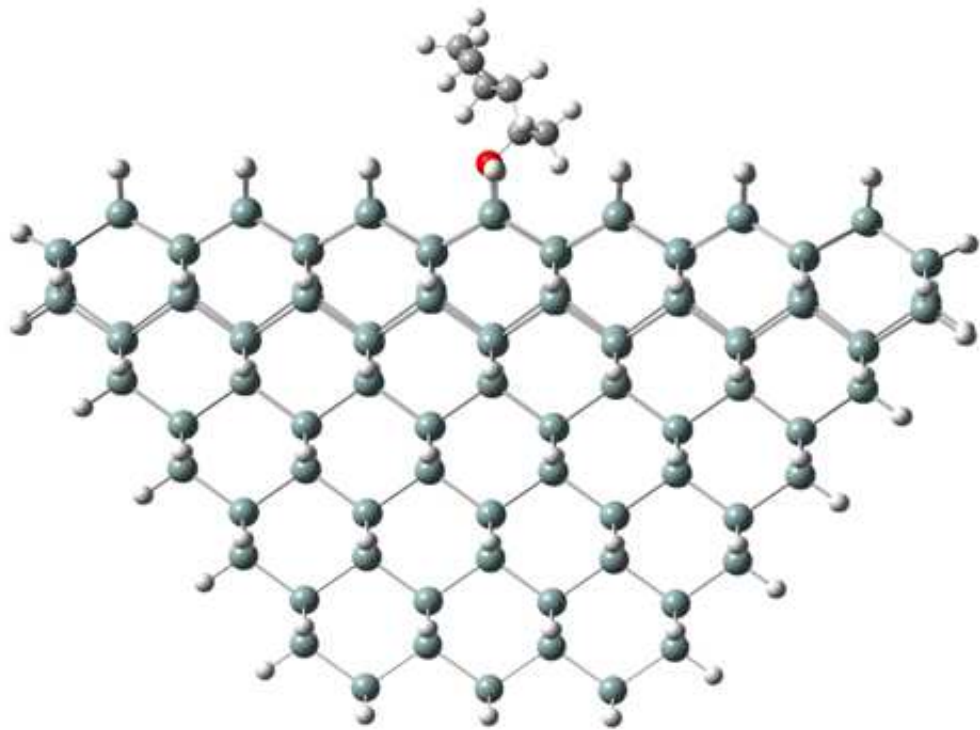

(b)

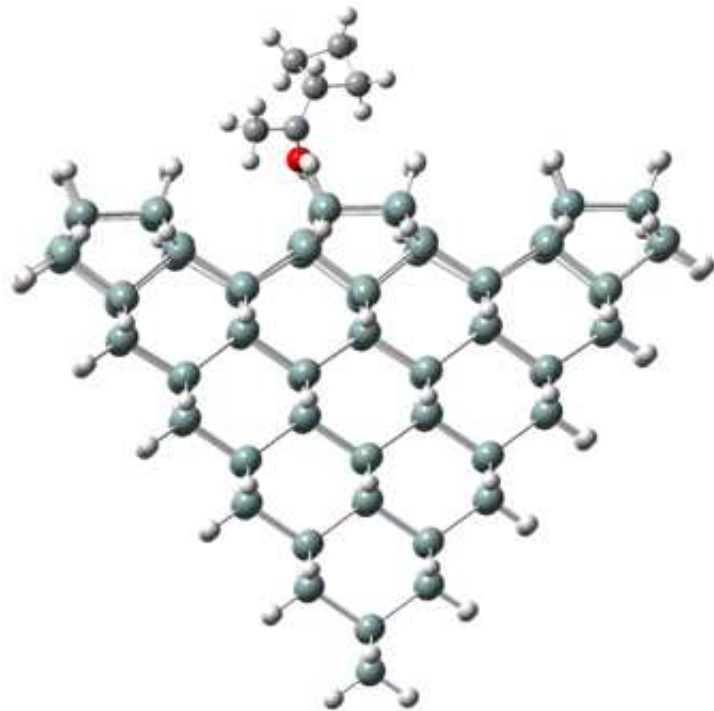

Supplement: Supplementary file 2 [file 4144945]

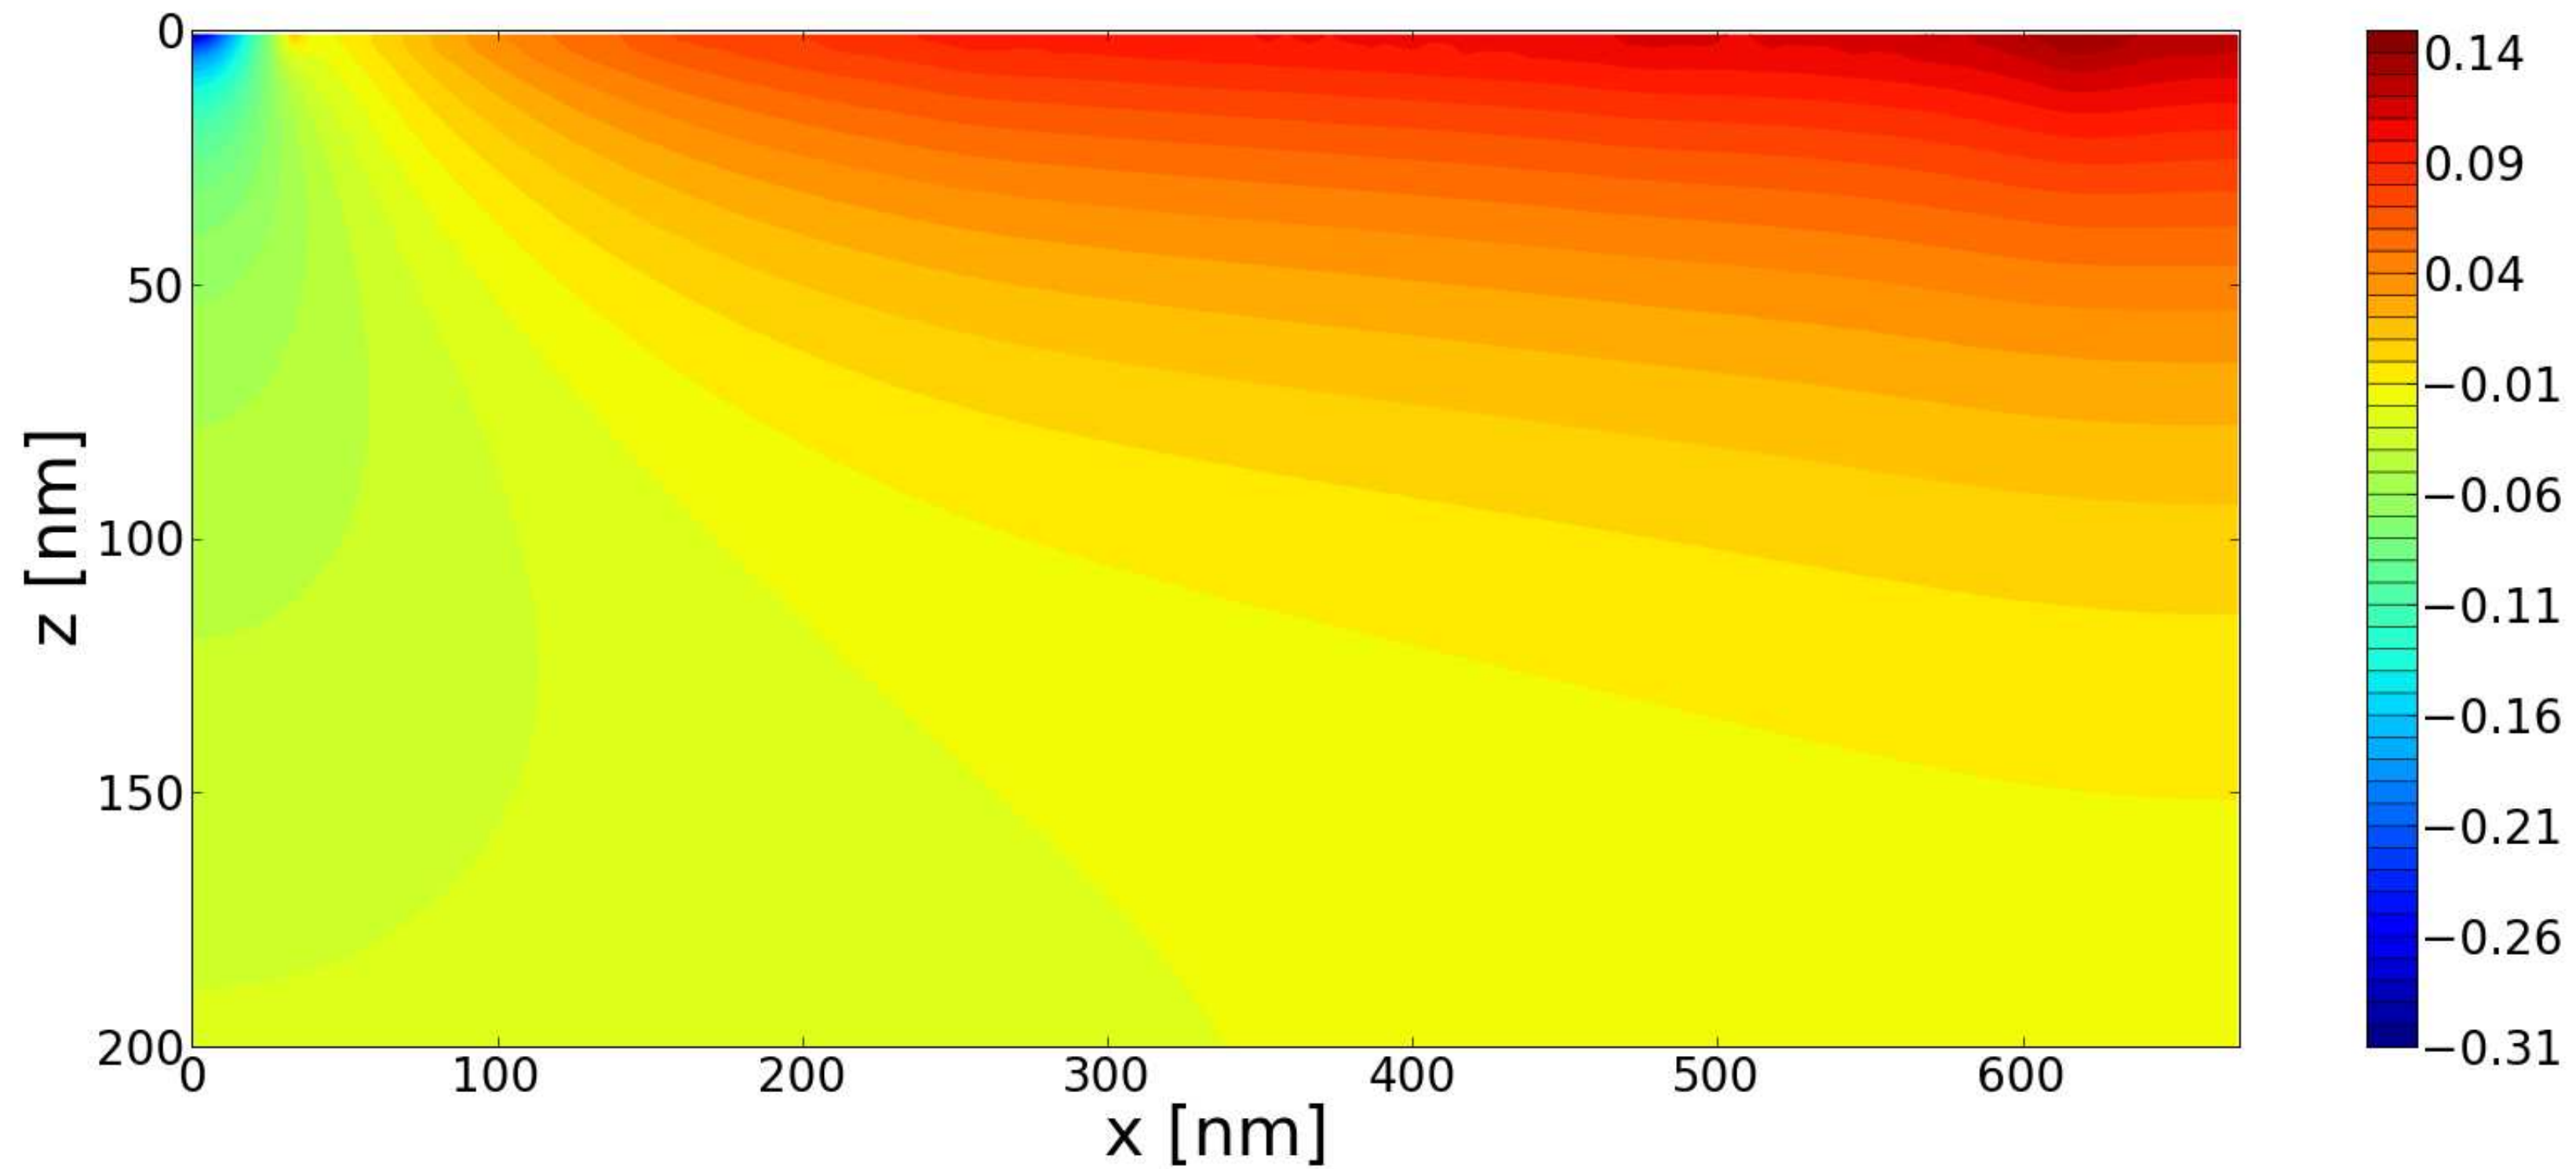

Supplement: Supplementary file 3 [file 4144945]

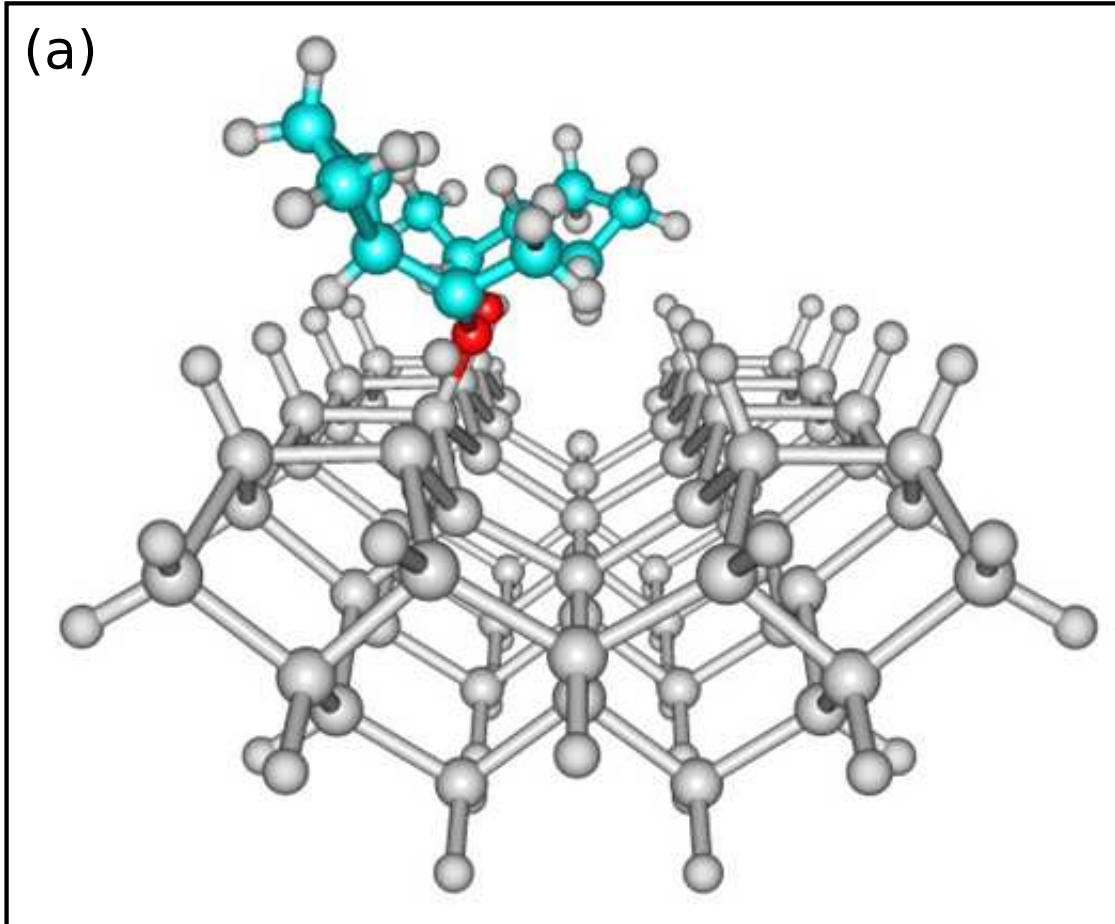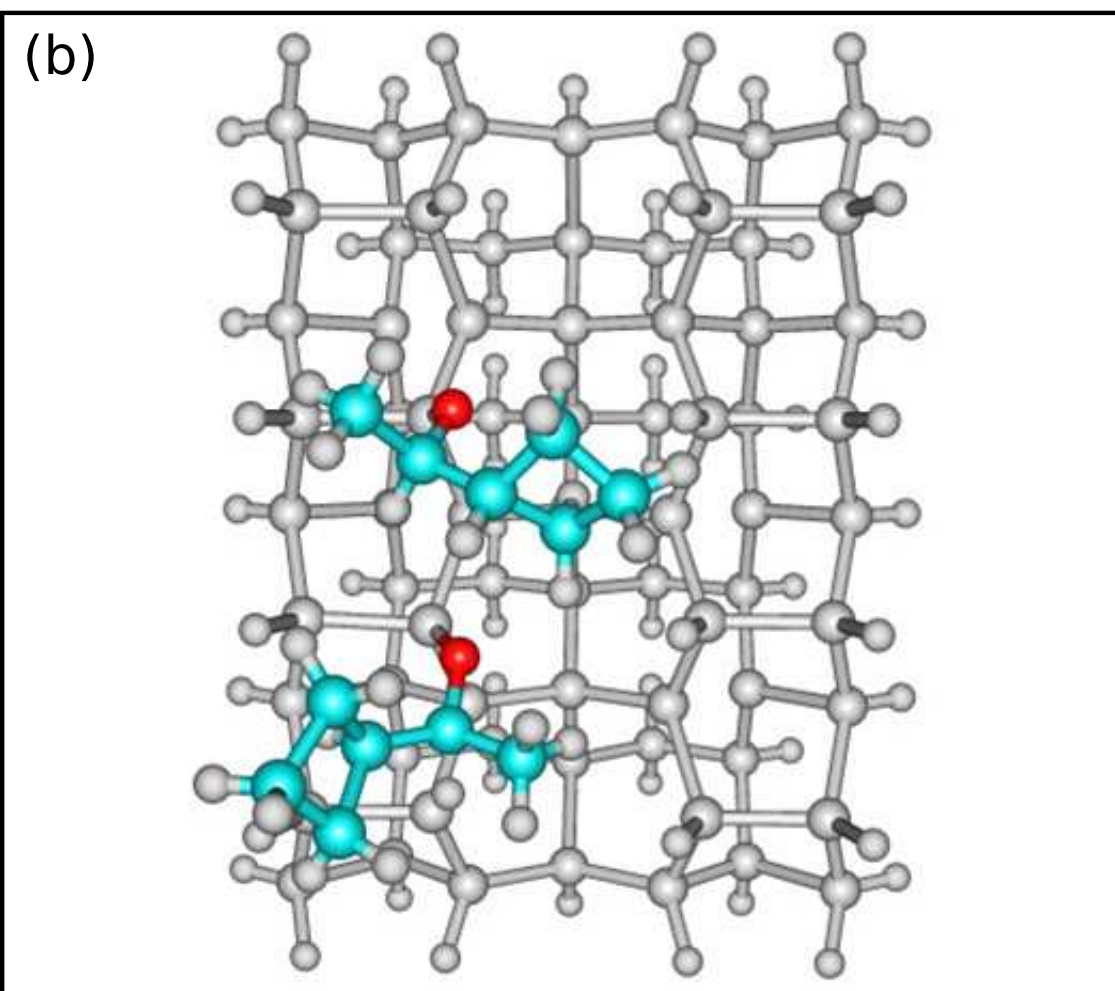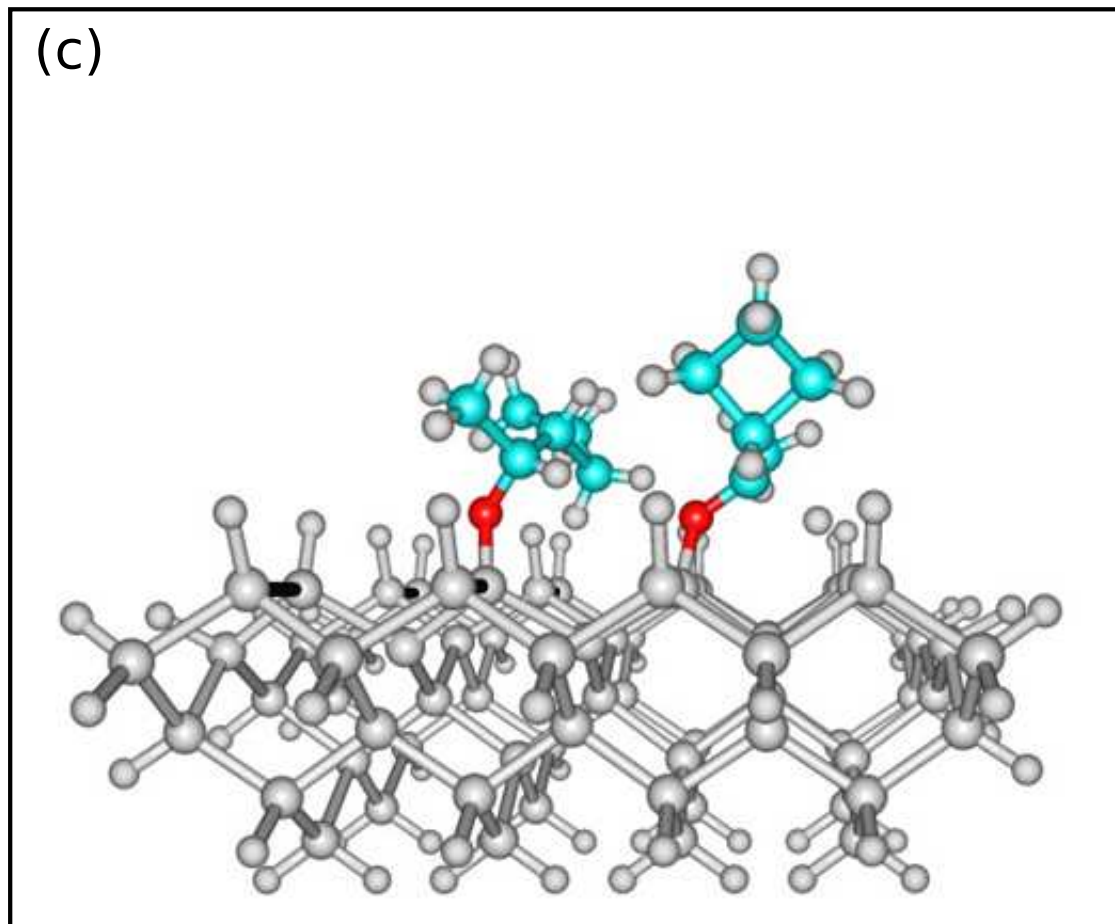

Supplement: Supplementary file 4 [file 4144945]

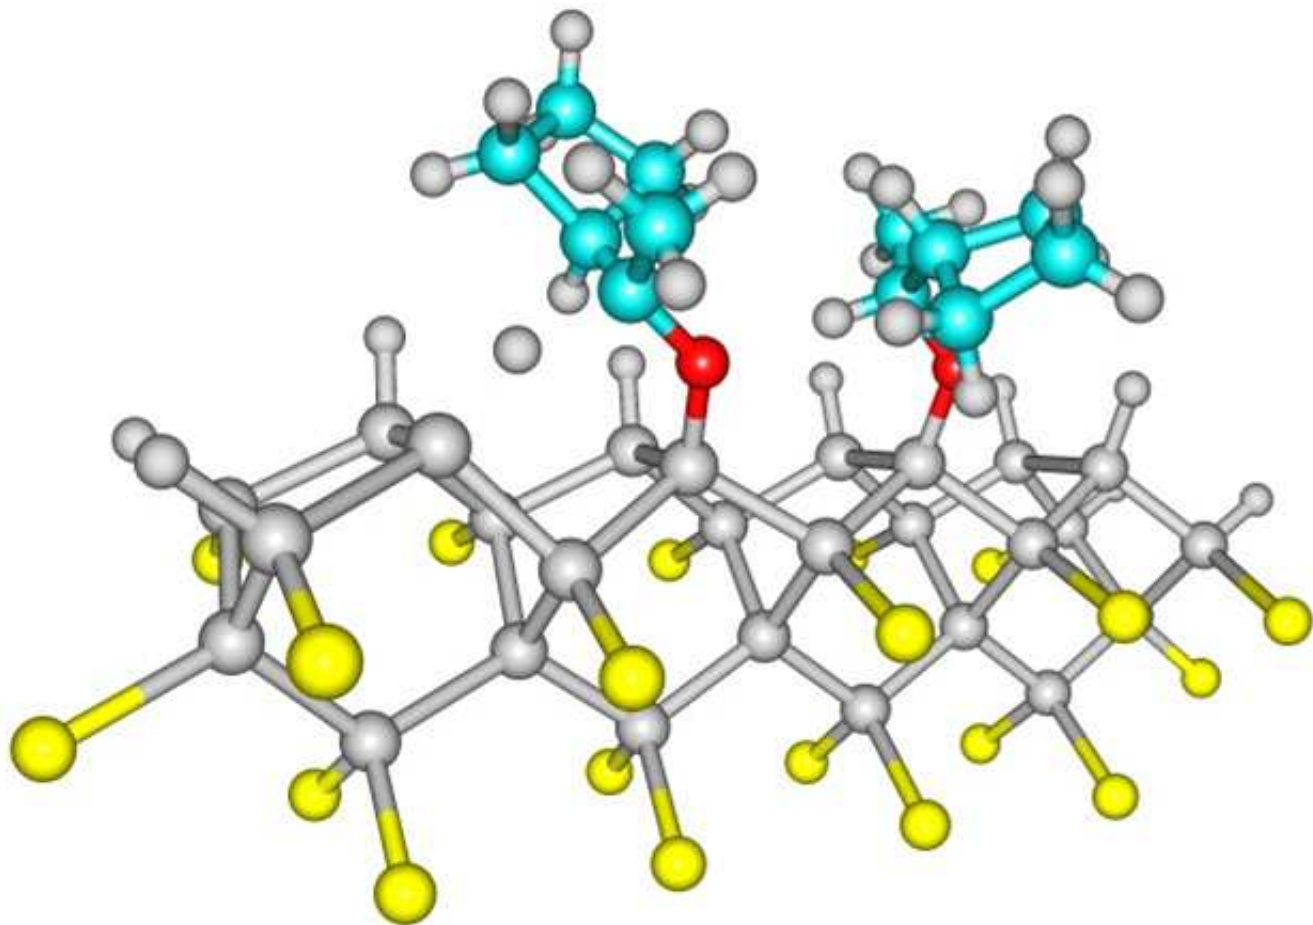

Supplement: Supplementary file 6 [file 4144945]
